# Supplementary material
Source: Elsevier journal article supplement (https://www.sciencedirect.com/science/article/pii/S1665268121002696)
Supplement: mmc1 [file S1665268121002696:mmc1.docx]

**Supplementary Table 1** DAVID database was used to analyze the enriched KEGG pathways.

| **Term** | **PValue** | **Genes** |
| --- | --- | --- |
| hsa04610:Complement and coagulation cascades | 0.004249168 | C8A, C7, FGB, C6 |
| hsa05020:Prion diseases | 0.011375974 | C8A, C7, C6 |
| hsa04931:Insulin resistance | 0.014588428 | PPP1R3B, GYS2, FOXO1, PPARGC1A |
| hsa04152:AMPK signaling pathway | 0.020600369 | ADRA1A, GYS2, FOXO1, PPARGC1A |
| hsa04910:Insulin signaling pathway | 0.027793044 | PPP1R3B, GYS2, FOXO1, PPARGC1A |
| hsa00140:Steroid hormone biosynthesis | 0.031210886 | HSD17B6, SRD5A1, CYP2E1 |
| hsa00982:Drug metabolism - cytochrome P450 | 0.041757789 | ADH4, FMO3, CYP2E1 |
